# Supplementary material
Source: PubMed Central journal article supplement (PMC7787134)
Supplement: 41576_2020_305_MOESM1_ESM.pdf [file 41576_2020_305_MOESM1_ESM.pdf]

## **Supplementary information**

---

# **The influence of evolutionary history on human health and disease**

---

In the format provided by the authors and unedited

**Table S1.** Example locally adapted genes in human populations with relevance to human traits and disease risk.

| Gene                                    | Pressure                         | Trait                                           | Disease                                                      | Refs      |
|-----------------------------------------|----------------------------------|-------------------------------------------------|--------------------------------------------------------------|-----------|
| <i>FADS1/2</i>                          | High/low-fat diet                | Lipid metabolism                                | Cardio-metabolic disease                                     | 1–6       |
| <i>CPT1A</i>                            | High-fat diet, cold temperatures | Lipid metabolism; energy homeostasis; height    | Hypoketotic hypoglycemia; high infant mortality              | 2,4,7     |
| <i>SLC22A4</i>                          | Low ergothioneine levels         | Ergothioneine absorption                        | Celiac disease, ulcerative colitis, irritable bowel syndrome | 2,8,9     |
| <i>CREBRF</i>                           | Starvation                       | Fat storage; energy use                         | Type 2 diabetes; obesity                                     | 1,2,10    |
| <i>HBB, G6PD, GYPA, GYPB, GYPC</i>      | Malaria infection                | Malaria resistance (through various mechanisms) | Sickle cell anemia; thalassemia; G6PD deficiency             | 1,2       |
| <i>APOL1</i>                            | Trypanosome infection            | Trypanosome resistance; cytotoxicity            | Chronic kidney disease                                       | 1,2,11    |
| <i>TRPM8</i>                            | Cold temperatures                | Thermoregulation                                | Migraine                                                     | 1,2,12    |
| <i>SLC24A5, SLC45A2, MC1R, BNC2</i>     | UV radiation                     | Skin pigmentation                               | Dermatological disorders (keratosis, sunburn)                | 2,9,13,14 |
| <i>TLR6-TLR1-TLR10, HLA, STAT2, OAS</i> | Pathogens                        | Immune system sensitivity                       | Autoimmune and inflammatory disorders                        | 15–20     |
| <i>SLC16A11, SLC16A13</i>               | Diet                             | Lipid metabolism                                | Type 2 diabetes                                              | 2,21      |
| <i>EGLN1, EPAS1</i>                     | High altitude                    | Response to hypoxia                             | Erythrocytosis, pulmonary hypertension                       | 22–25     |

### Supplementary References

- Fan, S., Hansen, M. E. B., Lo, Y. & Tishkoff, S. A. Going global by adapting local: A review of recent human adaptation. *Science* **354**, 54–59 (2016).
- Rees, J. S., Castellano, S. & Andrés, A. M. The Genomics of Human Local Adaptation. *Trends in Genetics* (2020). doi:10.1016/j.tig.2020.03.006
- Mathieson, S. & Mathieson, I. FADS1 and the timing of human adaptation to agriculture. *Mol. Biol. Evol.* (2018). doi:10.1093/molbev/msy180
- Fumagalli, M. *et al.* Greenlandic Inuit show genetic signatures of diet and climate adaptation. *Science* **349**, 1343–7 (2015).
- Kothapalli, K. S. D. *et al.* Positive Selection on a Regulatory Insertion-Deletion Polymorphism in FADS2 Influences Apparent Endogenous Synthesis of Arachidonic Acid. *Mol. Biol. Evol.* (2016). doi:10.1093/molbev/msw049
- Buckley, M. T. *et al.* Selection in Europeans on fatty acid desaturases associated with dietary changes. *Mol. Biol. Evol.* (2017). doi:10.1093/molbev/msx103
- Clemente, F. J. *et al.* A selective sweep on a deleterious mutation in CPT1A in Arctic populations. *Am. J. Hum. Genet.* (2014). doi:10.1016/j.ajhg.2014.09.016
- Wang, M. H. *et al.* Contribution of higher risk genes and European admixture to Crohn’s disease in African Americans. *Inflamm. Bowel Dis.* (2012). doi:10.1002/ibd.22931
- Mathieson, I. *et al.* Genome-wide patterns of selection in 230 ancient Eurasians. *Nature* **528**, 499–503 (2015).
- Minster, R. L. *et al.* A thrifty variant in CREBRF strongly influences body mass index in Samoans. *Nat. Genet.* (2016). doi:10.1038/ng.3620
- Genovese, G. *et al.* Association of trypanolytic ApoL1 variants with kidney disease in African Americans. *Science* (2010). doi:10.1126/science.1193032
- Key, F. M. *et al.* Human local adaptation of the TRPM8 cold receptor along a latitudinal cline. *PLoS Genet.* 1–30 (2018). doi:10.1371/journal.pgen.1007298
- Sturm, R. A. & Duffy, D. L. Human pigmentation genes under environmental selection. *Genome Biology* (2012). doi:10.1186/gb-2012-13-9-248

14. Dannemann, M. & Kelso, J. The Contribution of Neanderthals to Phenotypic Variation in Modern Humans. *Am. J. Hum. Genet.* **101**, 578–589 (2017).
15. Nédélec, Y. *et al.* Genetic Ancestry and Natural Selection Drive Population Differences in Immune Responses to Pathogens. *Cell* (2016). doi:10.1016/j.cell.2016.09.025
16. Quach, H. *et al.* Genetic Adaptation and Neandertal Admixture Shaped the Immune System of Human Populations. *Cell* (2016). doi:10.1016/j.cell.2016.09.024
17. Deschamps, M. *et al.* Genomic Signatures of Selective Pressures and Introgression from Archaic Hominins at Human Innate Immunity Genes. *Am. J. Hum. Genet.* **98**, 5–21 (2016).
18. Enard, D. & Petrov, D. A. Evidence that RNA Viruses Drove Adaptive Introgression between Neanderthals and Modern Humans. *Cell* **175**, 360-371.e13 (2018).
19. Gittelman, R. M. *et al.* Archaic Hominin Admixture Facilitated Adaptation to Out-of-Africa Environments. *Curr. Biol.* **26**, 3375–3382 (2016).
20. Zeberg, H. & Pääbo, S. The major genetic risk factor for severe COVID-19 is inherited from Neanderthals. *Nature* (2020). doi:10.1038/s41586-020-2818-3
21. Williams Amy, A. L. *et al.* Sequence variants in SLC16A11 are a common risk factor for type 2 diabetes in Mexico. *Nature* (2014). doi:10.1038/nature12828
22. Huerta-Sanchez, E. *et al.* Altitude adaptation in Tibetans caused by introgression of Denisovan-like DNA. *Nature* **512**, 194–197 (2014).
23. Bigham, A. W. & Lee, F. S. Human high-altitude adaptation: Forward genetics meets the HIF pathway. *Genes Dev.* **28**, 2189–2204 (2014).
24. Bigham, A. W. *et al.* Andean and Tibetan patterns of adaptation to high altitude. *Am. J. Hum. Biol.* (2013). doi:10.1002/ajhb.22358
25. Crawford, J. E. *et al.* Natural Selection on Genes Related to Cardiovascular Health in High-Altitude Adapted Andeans. *Am. J. Hum. Genet.* (2017). doi:10.1016/j.ajhg.2017.09.023
